# Supplementary material for: Different Effects of Metformin and A769662 on Sodium Iodate-Induced Cytotoxicity in Retinal Pigment Epithelial Cells: Distinct Actions on Mitochondrial Fission and Respiration
Source: MDPI journal article supplement (doi:10.3390/antiox9111057), 2020-10-28
Supplement: s1 [file s1]

Supplementary figures:

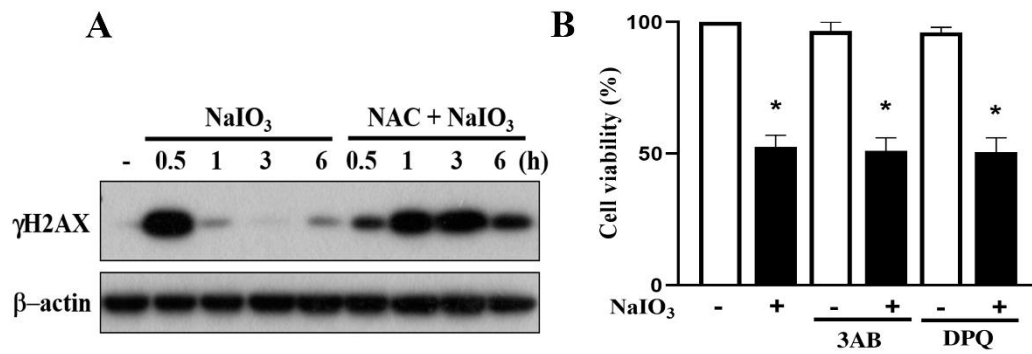

**Supplementary Figure S1.** NAC enhances DNA damage in NaIO<sub>3</sub> treated RPE cells. **(A)** Cells were pretreated with NAC (10 mM) followed by NaIO<sub>3</sub> stimulation at indicated time points. γH2AX protein was determined by immunoblotting. **(B)** Cells were pretreated with 3AB (50 μM) or DPQ (25 μM) for 20 min followed by NaIO<sub>3</sub> (30 mM) for 18 h. Cell viability was determined by Annexin V/PI staining using flow cytometry. Data were mean ± SEM from three independent experiments \*p < 0.05, indicating the cytotoxic effects of NaIO<sub>3</sub>.

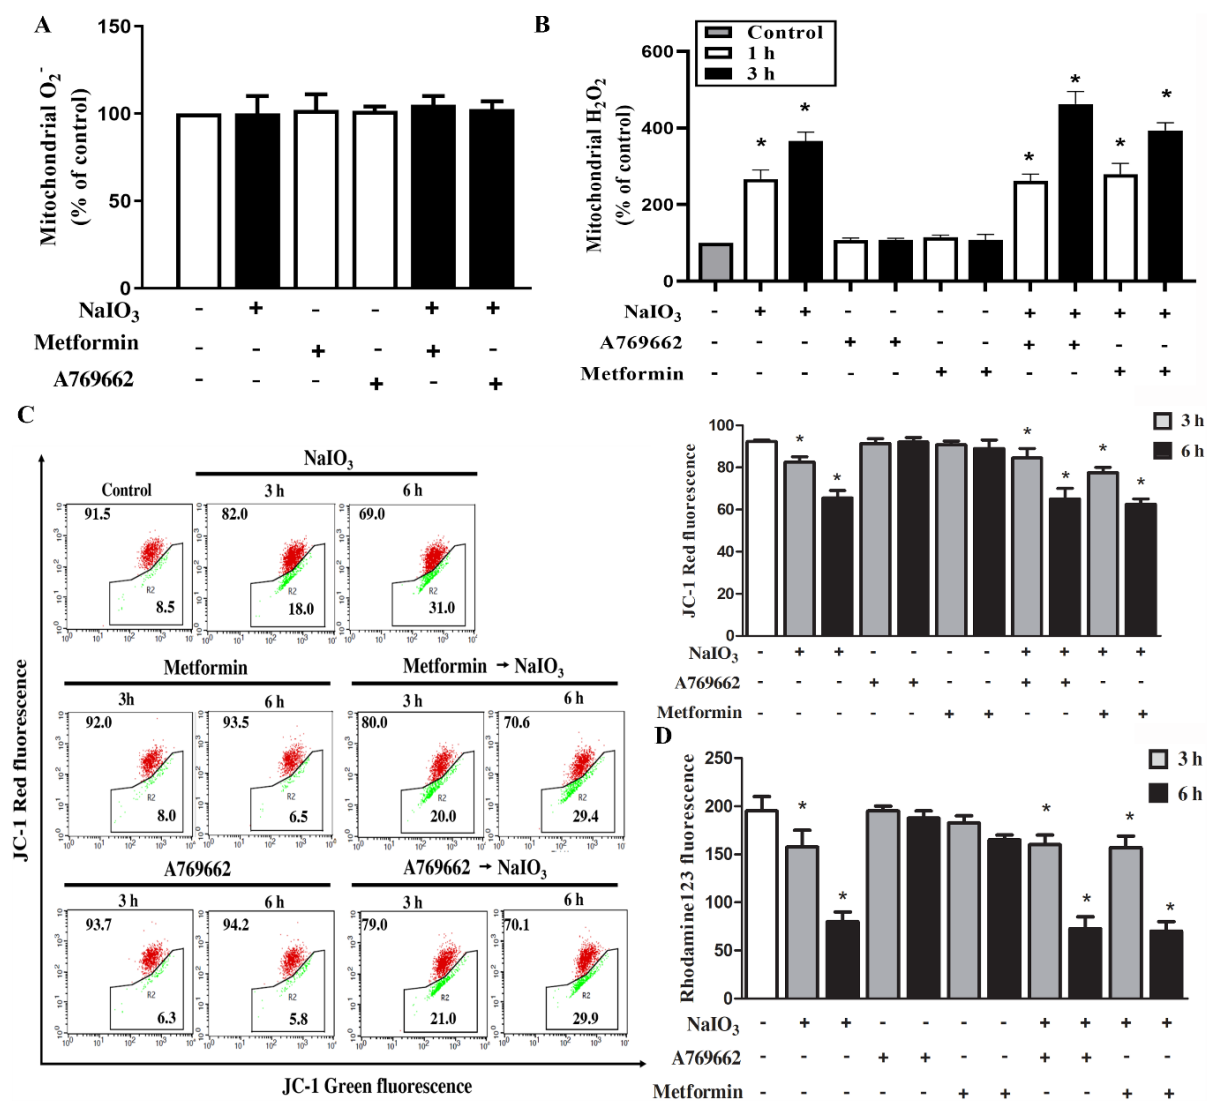

**Supplementary Figure S2.** A769662 and metformin do not affect NaIO<sub>3</sub>-induced mitochondrial H<sub>2</sub>O<sub>2</sub> production nor decreased mitochondrial membrane potential. Cells were pretreated with metformin (6 mM) or A769662 (30  $\mu$ M) 20 min prior to NaIO<sub>3</sub> (30 mM) stimulation for the indicated times. Mitochondrial O<sub>2</sub><sup>-</sup> (A) and mitochondrial H<sub>2</sub>O<sub>2</sub> (B) were determined by mitoSOX and mitoPY1, respectively. Mitochondrial membrane potential was determined by JC-1 (C) and rhodamine123 (D), respectively. Data were mean  $\pm$  SEM from three independent experiments \* p < 0.05, indicating the significant effects of NaIO<sub>3</sub> to induce mitochondrial H<sub>2</sub>O<sub>2</sub> production and mitochondrial membrane potential loss.
